# Supplementary material for: Enhanced statistical sampling reveals microscopic complexity in the talin mechanosensor folding energy landscape
Source: PubMed Central journal article supplement (PMC7614079; doi:10.1038/s41567-022-01808-4), 2022-11-07
Supplement: EMS158115-supplement-Fig__S1.pdf [file EMS158115-supplement-Fig__S1.pdf]

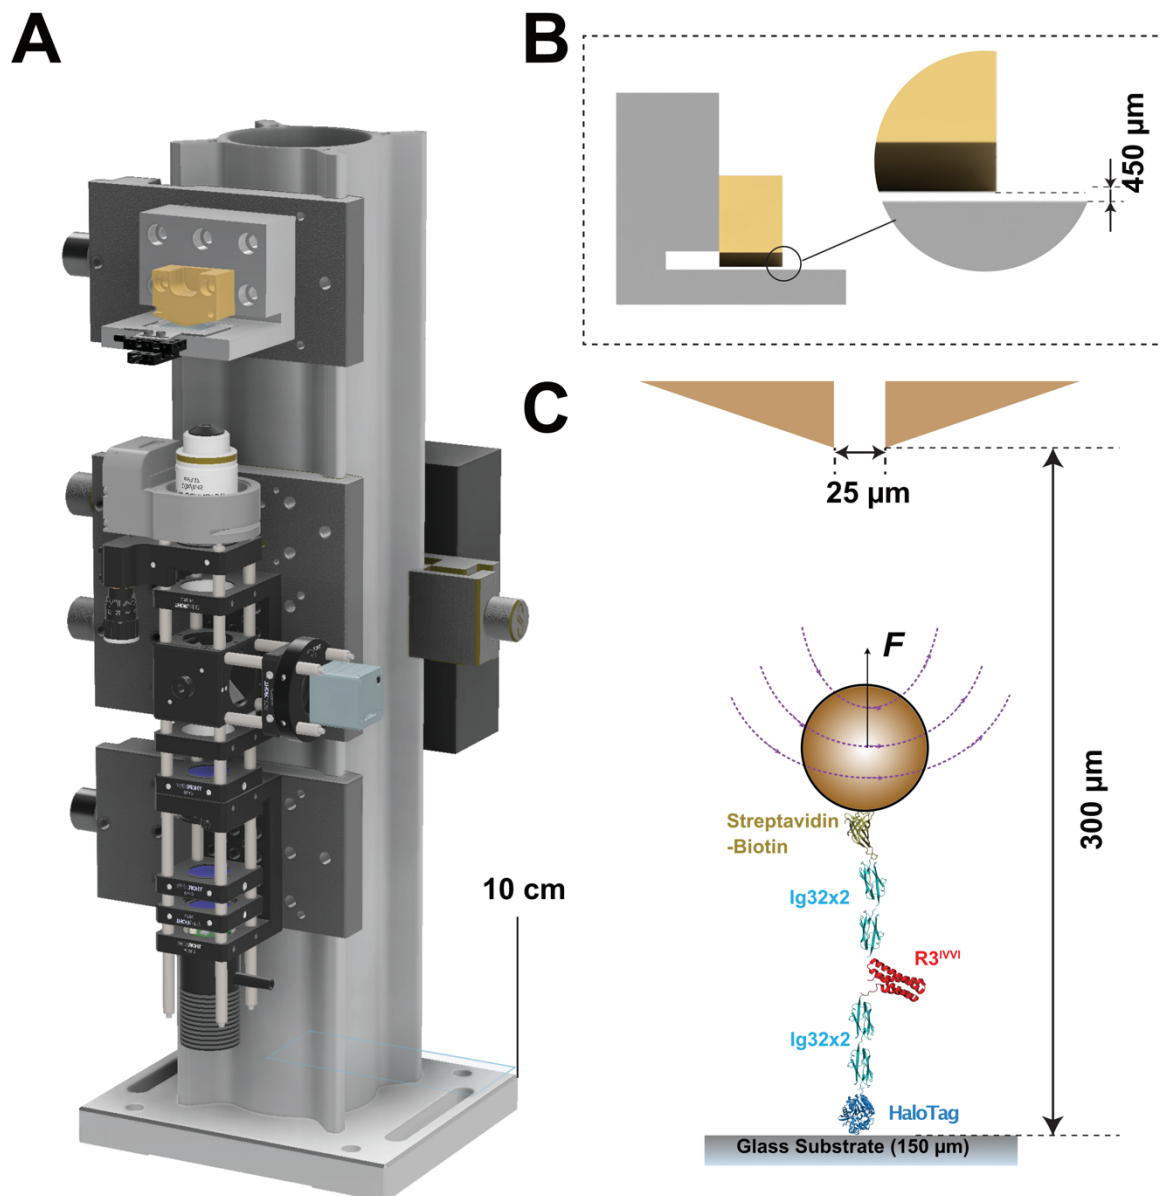

**Figure S1: Magnetic tweezers design for ultra-stable single-protein measurements.** (A) Three-dimensional model of our magnetic tweezers setup. (B) Detail of the measuring apparatus. The magnetic tape head is mounted on a high-precision CNC-manufactured piece that positions the tape head's gap at 450  $\mu\text{m}$  from the surface, allowing us to apply calibrated forces by controlling only the electric current supplied to the tape head. (C) Schematics of our magnetic tweezers assay for measuring  $R3^{\text{IVVI}}$  dynamics under force. By using #1 bottom glasses (150  $\mu\text{m}$  thick), the bead is positioned 300  $\mu\text{m}$  away from the tape head's gap, allowing us to apply forces between 0 and 42 pN when using currents between 0 and 1,000 mA.

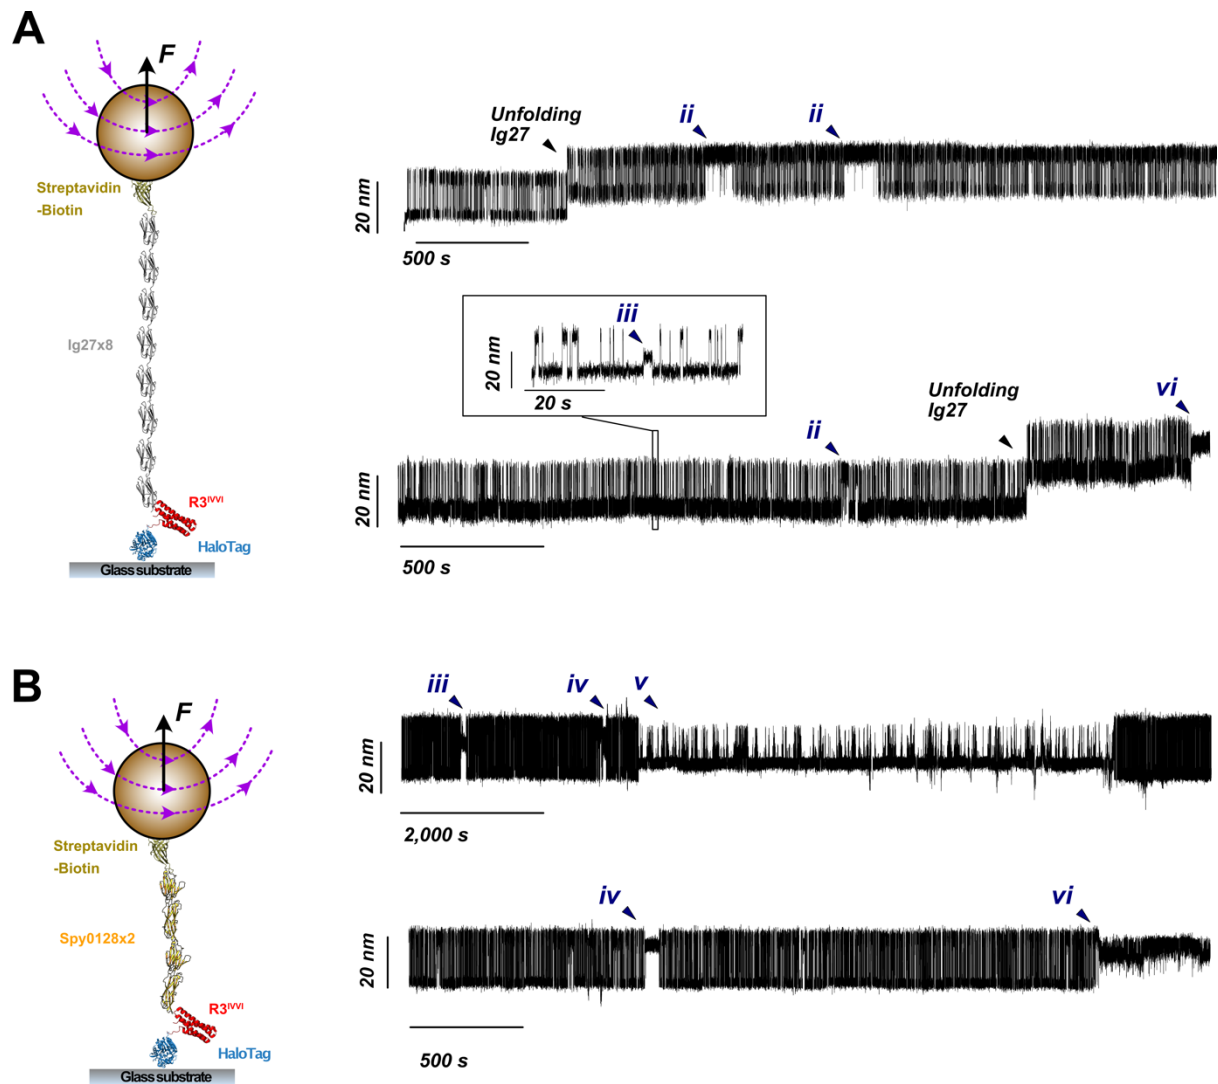

**Figure S2: R3<sup>IVVI</sup> low-probability states are independent of the molecular handles employed in the polyprotein construct.** (A) Schematics of the magnetic tweezer assay where the R3<sup>IVVI</sup> is flanked between 8 domains of the titin Ig27 and the HaloTag. Recordings using this construct at a  $F_{0.5}$  display the whole repertoire of low-probability states. Due to the lower mechanical stability of Ig27 compared to Ig32, we occasionally observed the stochastic unfolding of an Ig27 domain (fingerprinted by a step-size of ~15 nm), which makes this construct not ideal for long experiments. (B) Schematics of the magnetic tweezer assay where the R3<sup>IVVI</sup> is flanked between 2 inextensible Spy0128 domains and a HaloTag. Studying the dynamics of R3<sup>IVVI</sup> at a  $F_{0.5}$  enables detection of all the low-probability states measured with the Ig32 molecular handles.

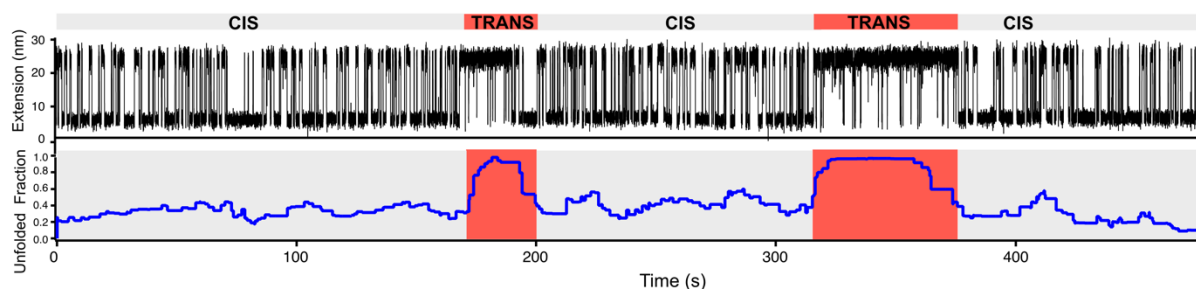

**Figure S3: Illustration of the algorithm for detection of the isomerized trans-state of P881.** (Upper) Typical trajectory of  $R3^{IVVI}$  at  $F_{0.5}$ , undergoing two cis-trans isomerization events. The trans-state is characterized by lower mechanical stability, which results in a shift of the equilibrium towards the unfolded conformation. (Lower) The trans-state can be systematically detected as a sudden increase in the unfolded fraction, measured as a running window calculated over 10 transitions.

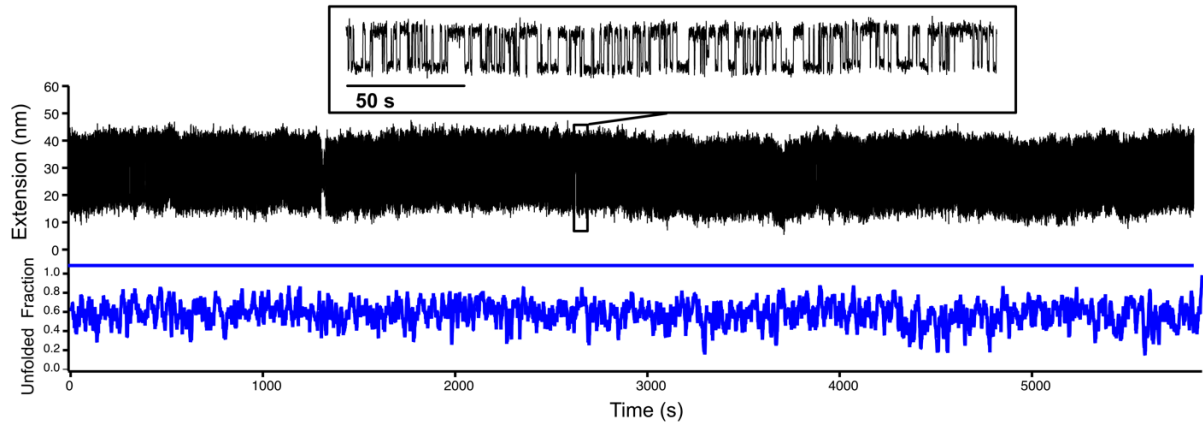

**Figure S4: Magnetic tweezers recording of R3<sup>IV</sup>I P881G at 7.5 pN.** Substituting Pro881 by Glycine abrogates the proline isomerized state (*ii*), which is not observed over hours-long measurements. Glycine mimics the trans-state of Proline, resulting in a protein with lower mechanical stability and faster folding dynamics.

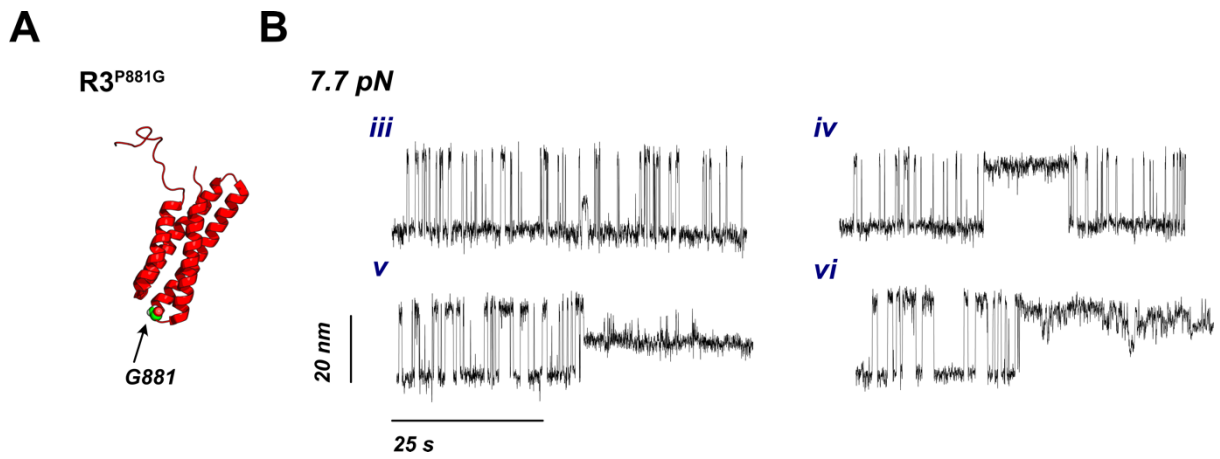

**Figure S5: Talin R3<sup>IVVI</sup> P881G exhibits low-probability states.** (A) Structural representation of talin R3<sup>IVVI</sup> highlighting the mutation of the Proline881 into a Glycine, which mimics the P881-trans state. (B) Magnetic tweezers trajectories of talin R3<sup>IVVI</sup> P881G at  $F_{0.5}$  displaying all low-probability states (except *ii*).

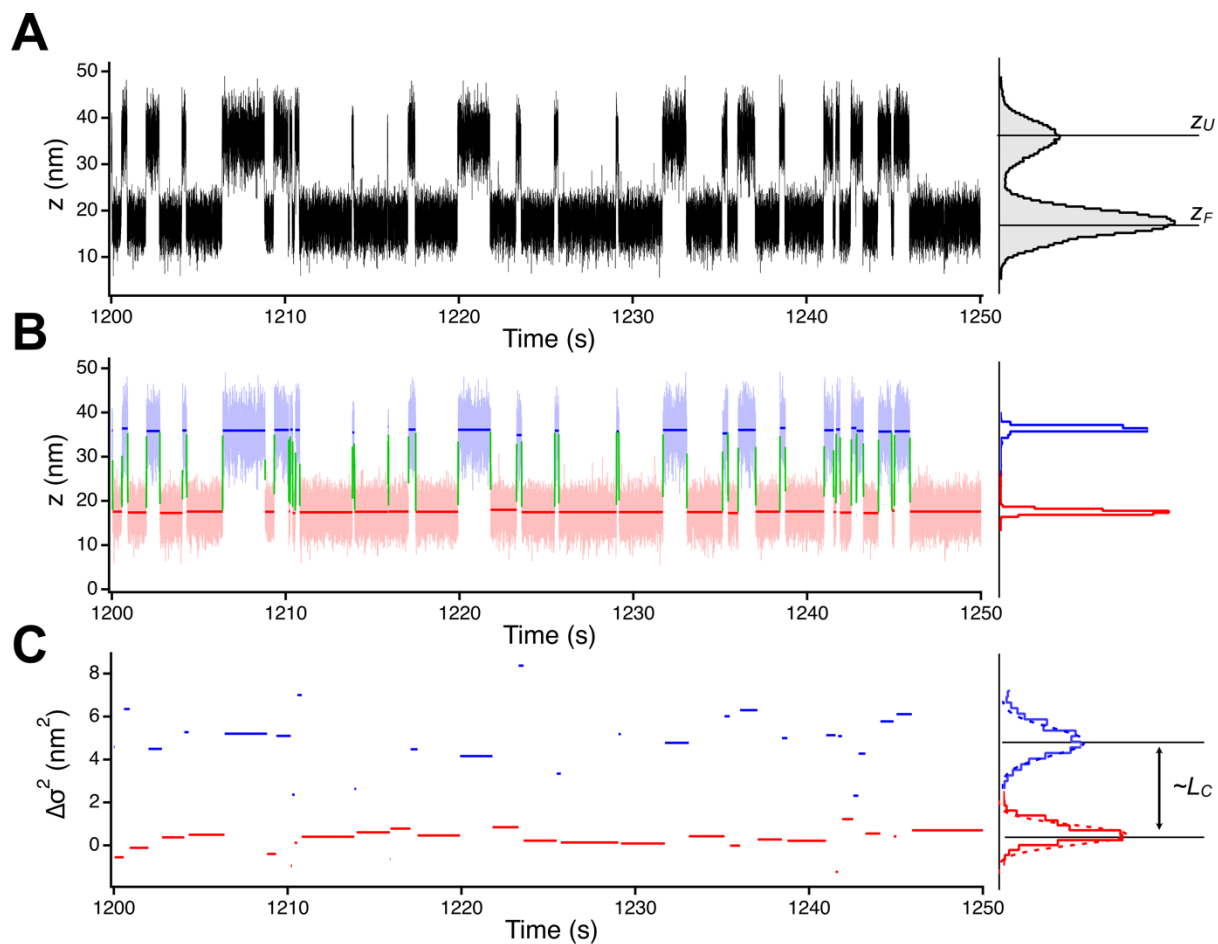

**Figure S6: Analysis method for calculating the molecular fluctuations of the R3<sup>IVI</sup> conformational states, here illustrated for the native state (i).** (A) Fragment of an R3<sup>IVI</sup> trajectory in state i. We calculate the average extensions of each conformation from the distribution of  $z(t)$  (here **F** and **U**) that establishes the thresholds for the discretization algorithm. (B) Processed trajectory, with conformation **F** labelled in red, conformation **U** in blue, and the transition paths in green. The average extension of each dwell fragment is shown in a darker color, and the calculated distributions in the right. (C) Change in variance calculated for the shown trajectory. The unfolded conformation shows higher fluctuations, which scale with a change in contour length of  $\sim 42$  nm.

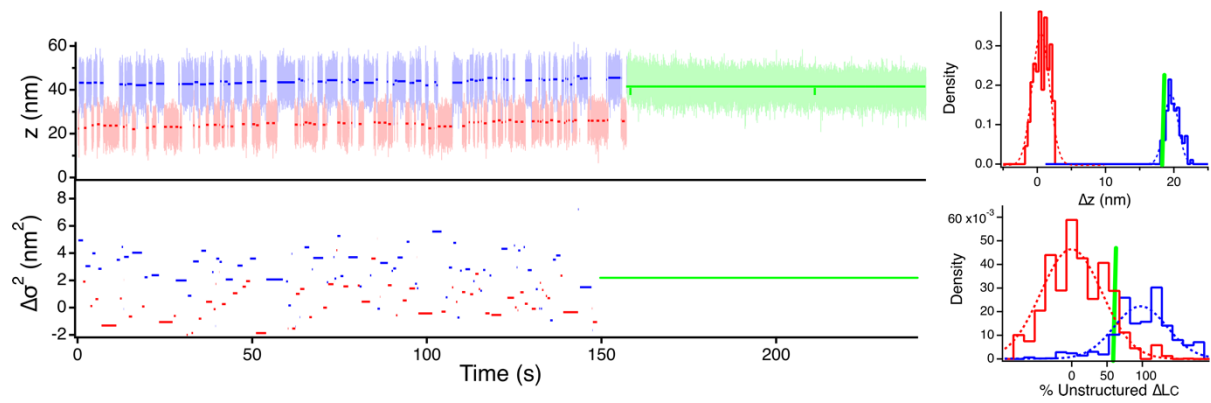

**Figure S7: Full-length vinculin binding recapitulates the molecular properties of R3<sup>IVVI</sup> state *iv*.** After full-length vinculin binds (green trace), the extension of R3<sup>IVVI</sup> decreases by ~3 nm, while its molecular fluctuations drop by ~50%. This indicates that half of R3<sup>IVVI</sup> sequence acquires a secondary structure that does not contribute to the molecular fluctuations, likely the coil-to-helix transition previously proposed to be triggered by vinculin binding. These properties are fully equivalent to those measured for state *iv*.

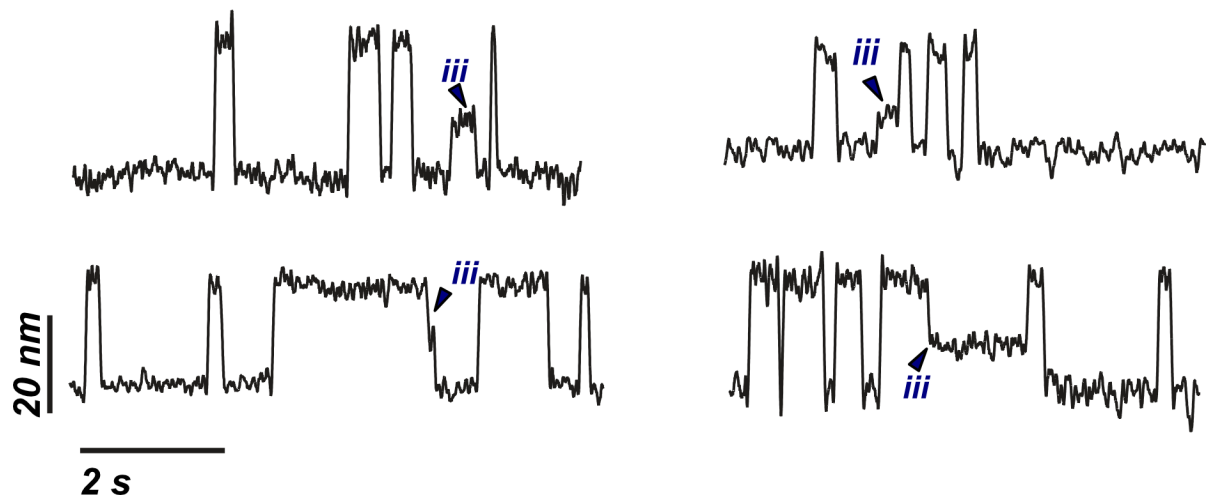

**Figure S8: State *iii* is a true folding intermediate, connected to both the folded and unfolded protein forms. State *iii* can be reached from the folded (upper traces) or unfolded (lower traces) forms, and escape to the folded (left traces) or to the unfolded (right traces) protein forms.**



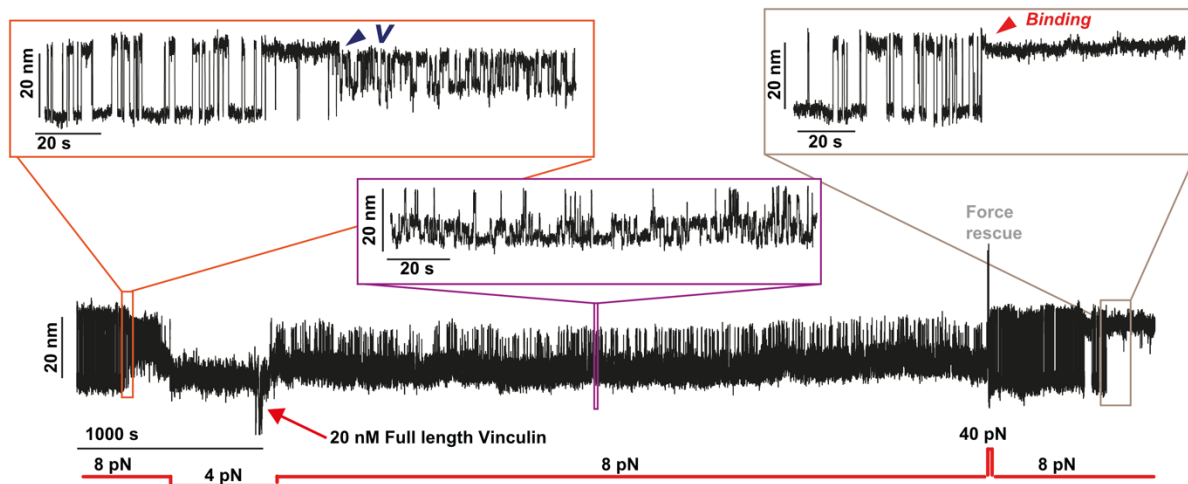

**Figure S9: Full-length vinculin does not bind to state  $v$ .** Magnetic tweezers recording showing the force protocol to demonstrate the inability of state  $v$  to recruit full-length vinculin. At 8 pN,  $R3^{IVVI}$  spontaneously falls into state  $v$  (orange inset). Subsequently, we decrease the force down to 5 pN to trap  $R3^{IVVI}$  in state  $v$  while we add 20 nM full-length vinculin (arrow). When increasing the force back to 8 pN,  $R3^{IVVI}$  shows the characteristic dynamics of state  $v$  (purple inset) for over an hour, indicating no vinculin binding. After rescuing  $R3^{IVVI}$  back to its native folding dynamics with a 40 pN pulse, full-length vinculin quickly binds after a few seconds, which stops the dynamics of  $R3^{IVVI}$  (brown inset).

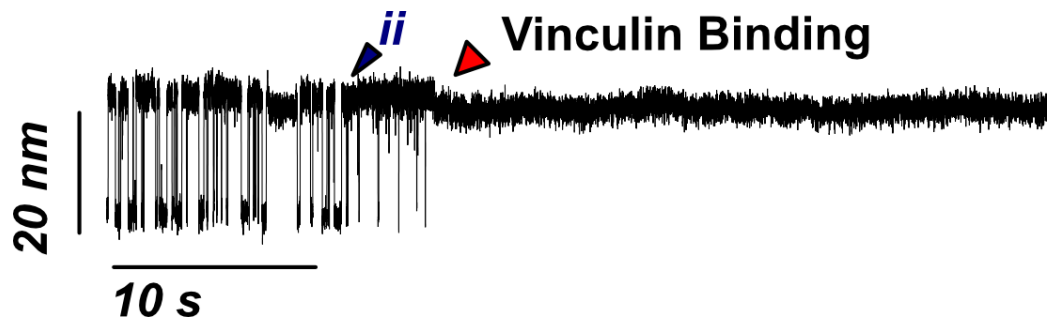

**Figure S10: Full-length vinculin binds to state *ii*.** This indicates that the trans-state of P881 does not interfere with full-length vinculin binding.

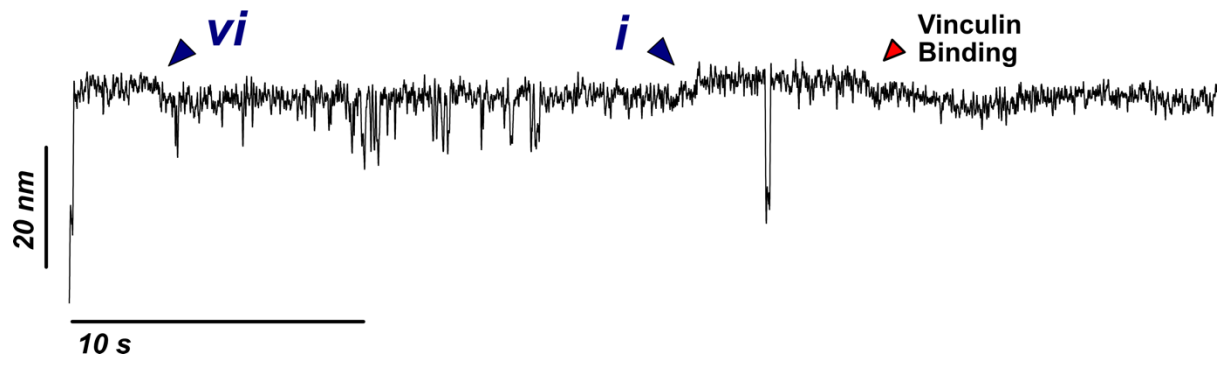

**Figure S11: Full-length vinculin does not bind to state *vi*.**  $R3^{VI}$  spontaneously falls into state *vi* and escapes after ~15 s, after which vinculin quickly binds.
